# Supplementary material for: Design, Synthesis, Anticancer Activity, and Solid Lipid Nanoparticle Formulation of Indole- and Benzimidazole-Based Compounds as Pro-Apoptotic Agents Targeting Bcl-2 Protein
Source: PubMed Central journal article supplement (PMC7912796; doi:10.3390/ph14020113), 2021-02-01
Supplement: pharmaceuticals-14-00113-s001.pdf [file pharmaceuticals-14-00113-s001.pdf]

# Design, Synthesis, Anticancer Activity, and Solid Lipid Nanoparticle Formulation of Indole-Based Compounds as Novel Pro-Apoptotic Agents Targeting Bcl-2 Protein

Manar I. Nagy<sup>1</sup>, Khaled M. Darwish<sup>1</sup>, Safaa M. Kishk<sup>1</sup>, Mohamed A. Tantawy<sup>2</sup>, Ali Nasr<sup>3,4</sup>, Mona Qushawy<sup>4,5</sup>, Shady Swidan<sup>6,7</sup>, Samia M. Mostafa<sup>1</sup>, and Ismail Salama<sup>1\*</sup>

<sup>1</sup> Department of Medicinal Chemistry, Faculty of Pharmacy, Suez Canal University, Ismailia 41522, Egypt; manar.nagy@pharm.suez.edu.eg (M.I.N.); khaled\_darwish@pharm.suez.edu.eg (K.M.D.); safaa\_keshk@pharm.suez.edu.eg (S.M.K.); samiamostafa2010@hotmail.com (S.M.M.); ismail\_mohamed@pharm.suez.edu.eg (I.S.)

<sup>2</sup> Hormones Department, Medical Research Division, National Research Center, Dokki, Giza,12622, Egypt; mohamed\_tantawy@daad-alumni.de (M.T.)

<sup>3</sup> Department of Pharmaceutics, Faculty of Pharmacy, Port Said University, Port Said 42526, Egypt; a.nasr@pharm.psu.edu.eg (A.N.)

<sup>4</sup> Department of Pharmaceutics, Faculty of Pharmacy, Sinai University, Alarish, North Sinai 45511, Egypt

<sup>5</sup> Department of Pharmaceutics, Faculty of Pharmacy, University of Tabuk, Tabuk 71491, Saudi Arabia; mqushawy@ut.edu.sa (M.Q.)

<sup>6</sup> Department of Pharmaceutics, Faculty of Pharmacy, The British University in Egypt, El-Sherouk city, Cairo 11837, Egypt; shady.swidan@bue.edu.eg (S.S.)

<sup>7</sup> The Center for Drug Research and Development (CDRD), Faculty of Pharmacy, The British University in Egypt, El-Sherouk city, Cairo 11837, Egypt

\* Correspondence: ismail\_mohamed@pharm.suez.edu.eg (I.S.); Tel.: +02-0102-225-7643

## Additional Experimental Detail

- 1) **Table S1:** The Data of Ligand-Docking Studies on Bcl-2 anti-apoptotic protein target.
- 2) **Figure S1:** Standard calibration curve of 8b using HPLC-UV analysis. All data are represented as mean of three independent experiments  $\pm$  SEM.
- 3) **Figure S2:** NMR spectra of all new compounds

**Table S1: The Data of Ligand-Docking Studies on Bcl-2 anti-apoptotic protein target**

| Ligand name | MOE docking Scores (S) <sup>a</sup> (Kcal mol <sup>-1</sup> ) | RMSD <sup>b</sup> (Å) | Ligand-target interaction description [Type; Length (Å); Angle (°); Binding Residues]                                                                                                                                                  |
|-------------|---------------------------------------------------------------|-----------------------|----------------------------------------------------------------------------------------------------------------------------------------------------------------------------------------------------------------------------------------|
| 3a          | -4.2200                                                       | 1.7838                | Hydrogen bonding ; 2.51 Å ; 148.0° ; Asp111-C=O side chain with benzimidazole (NH) ring<br>$\pi$ - $\pi$ stacking ; 3.85 Å ; Tyr108 side chain with benzimidazole ring                                                                 |
| 7b          | -4.7696                                                       | 1.5547                | Hydrogen bonding ; 2.98 Å ; 112.5° ; Arg146=NH side chain with 4-MeO                                                                                                                                                                   |
| 7d          | -4.5808                                                       | 1.7670                | Hydrogen bonding ; 2.10 Å ; 149.9° ; Arg146=NH side chain with pyridine (N) ring<br>$\pi$ -Hydrogen contact ; 4.15 Å ; Leu137 side chain with pyridine ring<br>$\pi$ -Hydrogen contact ; 4.17 Å ; Leu137 side chain with pyridine ring |
| 8a          | -4.7696                                                       | 1.2117                | Hydrogen bonding ; 2.10 Å ; 158.7° ; Arg146=NH side chain with NHC=O linker                                                                                                                                                            |
| 8b          | -4.8585                                                       | 1.6829                | Hydrogen bonding ; 2.15 Å ; 175.5° ; Arg146=NH side chain with NHC=O linker                                                                                                                                                            |
| 8c          | -6.2460                                                       | 1.7374                | Hydrogen bonding ; 2.66 Å ; 129.0° ; Arg146=NH side chain with indole (NH) ring<br>$\pi$ -Hydrogen interaction ; 3.33 Å ; Arg146-NH side chain with indole ring                                                                        |
| 8d          | -6.1846                                                       | 1.3960                | Hydrogen bonding ; 2.08 Å ; 156.0° ; Arg146=NH side chain with NHC=O linker<br>Hydrogen bonding ; 2.53 Å ; 142.5° ; Arg146-NH side chain with NHC=O linker                                                                             |
| 8f          | -5.7070                                                       | 2.6217                | Hydrogen bonding ; 2.30 Å ; 160.1° ; Arg146=NH side chain with NHC=O linker<br>$\pi$ -Hydrogen interaction ; 3.10 Å ; Arg146-NH side chain with indole ring                                                                            |

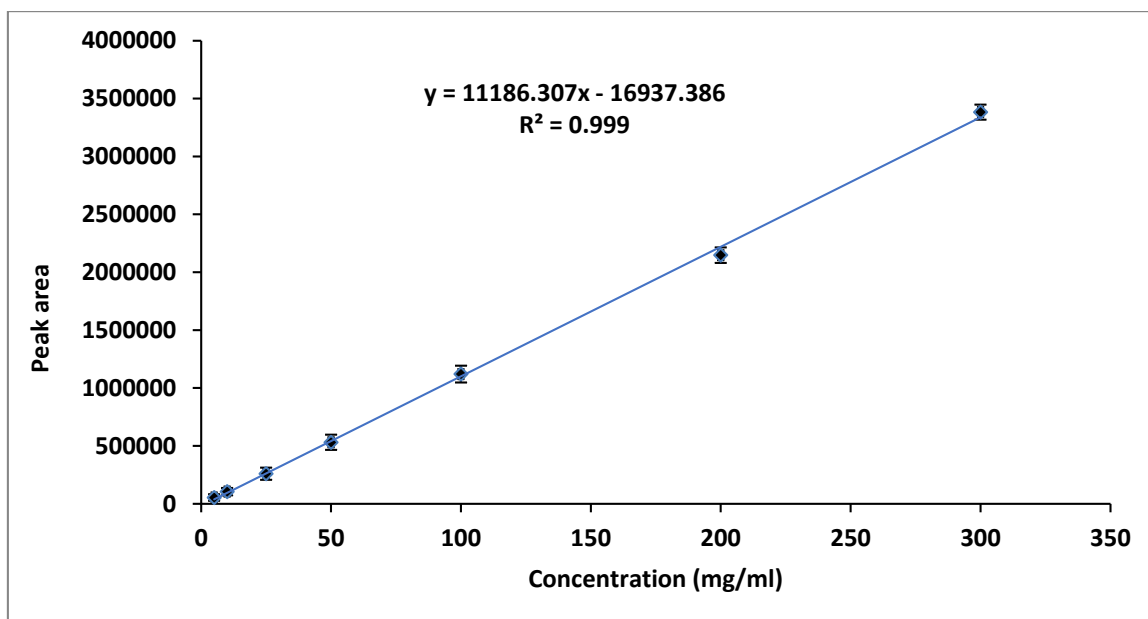

**Figure S1: Standard calibration curve of 8b using HPLC-UV analysis.** All data are represented as mean of three independent experiments  $\pm$  SEM.

Figure S2: NMR spectra of all new compounds

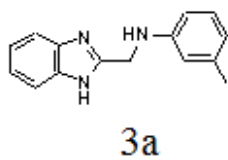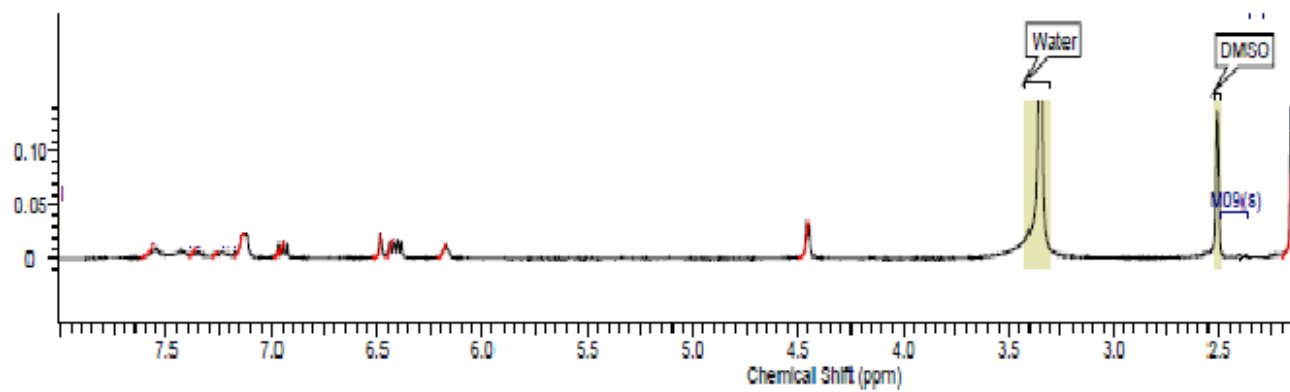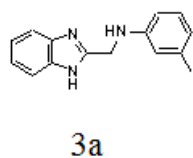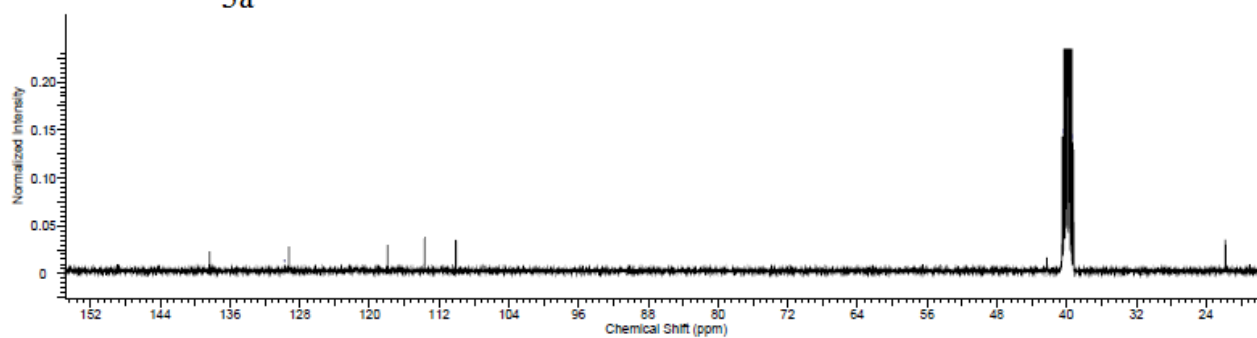

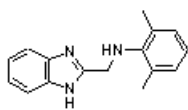

3b

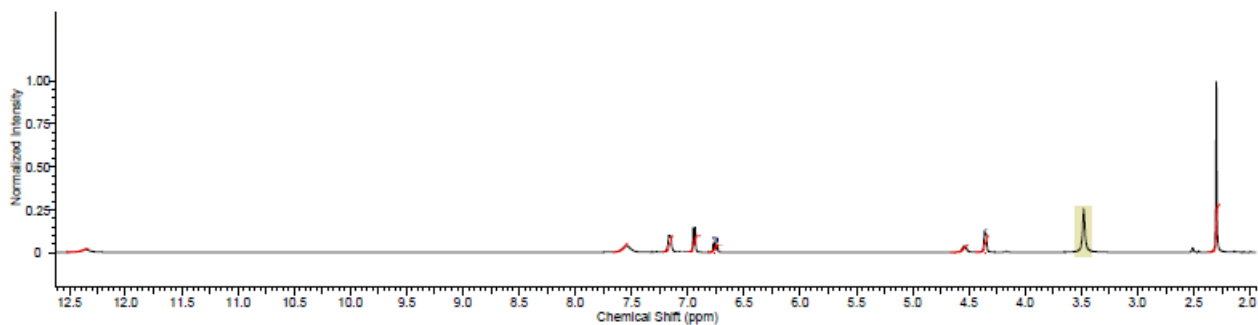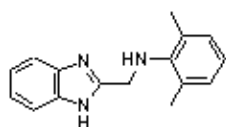

3b

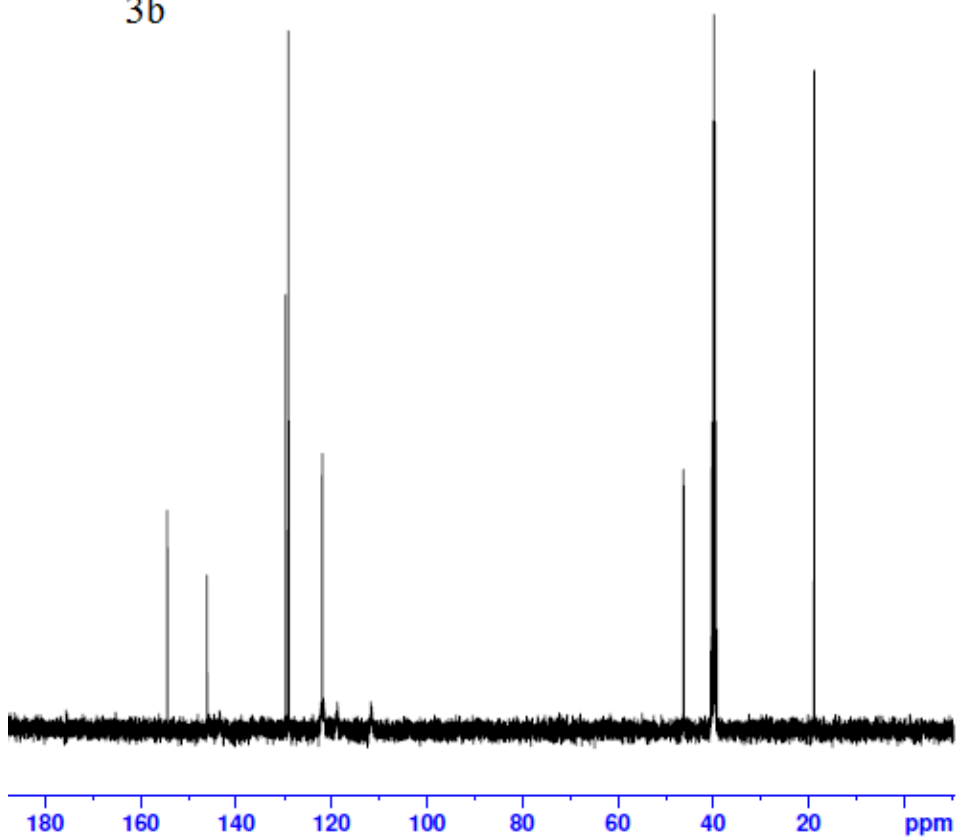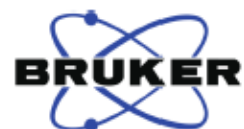

Current Data Parameters  
 NAME manar-3  
 EXPNO 2  
 PROCNO 1

F2 - Acquisition Parameters  
 Date\_ 20180812  
 Time 10.05  
 INSTRUM spect  
 PROBHD 5 mm PABBO BB/  
 PULPROG zgpg30  
 ID 65536  
 SOLVENT DMSO  
 NS 245  
 DS 4  
 SWH 24038.461 Hz  
 FIDRES 0.366798 Hz  
 AQ 1.3631488 sec  
 RG 205.37  
 DW 20.800 usec  
 DE 6.50 usec  
 TE 299.0 K  
 D1 2.0000000 sec  
 D11 0.0300000 sec  
 TD0 1

==== CHANNEL f1 =====  
 SFO1 100.6278588 MHz  
 NUC1 13C  
 P1 10.00 usec  
 P1W1 47.0000000 W

==== CHANNEL f2 =====  
 SFO2 400.1516006 MHz  
 NUC2 1H  
 CPDPRG2 waltz16  
 PCPD2 90.00 usec  
 P1W2 18.0000000 W  
 P1W12 0.34722000 W  
 P1W13 0.28125000 W

F2 - Processing parameters  
 SI 32768  
 SF 100.6177975 MHz  
 WDW EM  
 SSB 0  
 LB 1.00 Hz  
 GB 0  
 PC 1.40

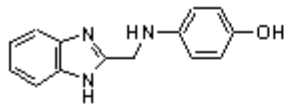

3d

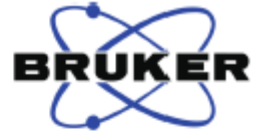

Current Data Parameters  
 NAME manar-nagy-5  
 EXPNO 1  
 PROCNO 1

F2 - Acquisition Parameters  
 Date\_ 20180812  
 Time 12.55  
 INSTRUM spect  
 PROBHD 5 mm PABBO BB/  
 PULPROG zg30  
 ID 65536  
 SOLVENT DMSO  
 NS 64  
 DS 2  
 SWH 8012.820 Hz  
 FIDRES 0.122266 Hz  
 AQ 4.0894465 sec  
 RG 205.37  
 DW 62.400 usec  
 DE 6.50 usec  
 TE 299.0 K  
 D1 1.00000000 sec  
 TDO 1

==== CHANNEL f1 =====  
 SFO1 400.1524711 MHz  
 NUC1 1H  
 P1 12.00 usec  
 PLW1 18.00000000 W

F2 - Processing parameters  
 SI 65536  
 SF 400.1500000 MHz  
 WDW EM  
 SSB 0  
 LB 0.30 Hz  
 GB 0  
 PC 1.00

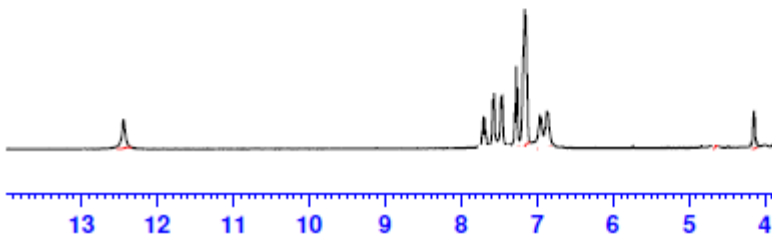

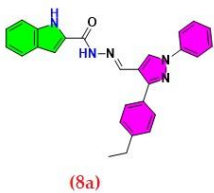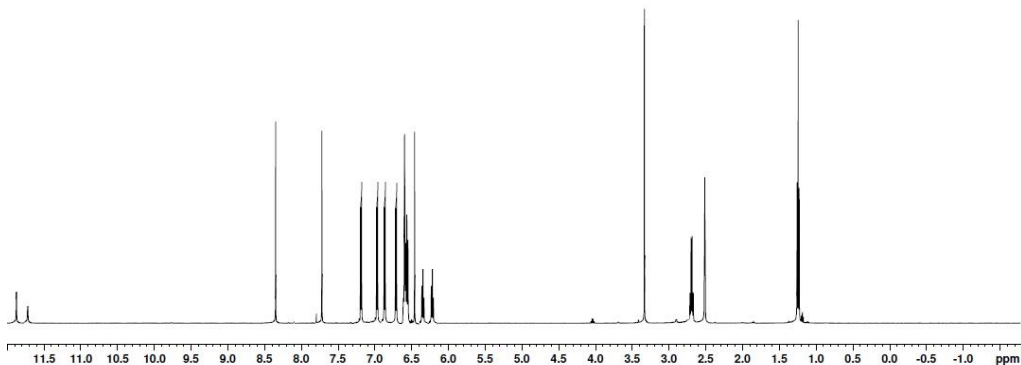

Mansoura University  
JEOL  
ECA-500 II  
NMR Unit

```

Filename      = Manar Nagy_1_proton-1
Author       = delta
Experiment   = proton_jmp
Sample Id    = Manar Nagy_11
Solvent      = DMSO-D6
Creation Time = 1-SBP-2019 15:54:33
Revision Time = 1-SBP-2019 15:30:11
Current Time  = 1-SBP-2019 15:30:47

Comment      = single pulse
Data Format   = 1D COMPLEX
Dim Size     = 13107
Dim Title    = Proton
Dim Units    = [ppm]
Dimensions   = X
Site         = JNM-ECAS500II
Spectrometer = DELTA2_NMR

Field Strength = 11.7473579[T] (500 MHz)
X_Acq_Duration = 1.4548992[s]
X_Domain      = 15
X_Freq        = 500.15991521[MHz]
X_Offset      = 6[ppm]
X_Points     = 15354
X_Fscans     = 1
X_Resolution  = 0.68733284[Hz]
X_Sweep      = 11.26126126[kHz]
X_Sweep_Clip = 9.00900001[kHz]
Irr_Domain    = Proton
Irr_Freq      = 500.15991521[MHz]
Irr_Offset    = 5.0[ppm]
Tri_Domain    = Proton
Tri_Freq      = 500.15991521[MHz]
Tri_Offset    = 5.0[ppm]
Clipped       = FALSE
Scans         = 40
Total Scans   = 40

Relaxation_Delay = 5[s]
Recov_Gain       = 44
Temp_Get        = 20.7[dC]
X_Acq_Width     = 14.5[us]
X_Acq_Time      = 1.4548992[s]
X_Angle         = 45[deg]
X_Attn         = 4.9[dB]
X_Pulse        = 7[us]
Irr_Mode       = Off
Tri_Mode        = Off
Densit_Preset  = FIDSB
Initial_Wait    = 1[s]
Repetition_Time = 6.4548992[s]
  
```

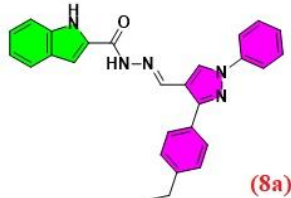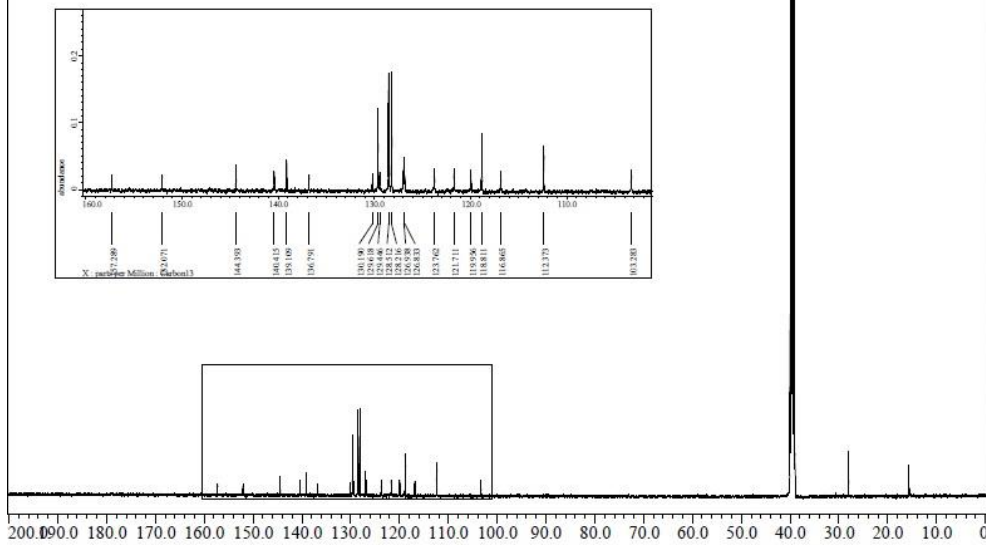

Mansoura University  
JEOL  
ECA-500 II  
NMR Unit

```

Filename      = Manar Nagy_1_carbon-1-6
Author       = delta
Experiment   = carbon_jmp
Sample Id    = Manar Nagy_1
Solvent      = DMSO-D6
Creation Time = 3-JUL-2019 23:48:44
Revision Time = 4-JUL-2019 09:55:33
Current Time  = 4-JUL-2019 09:57:36

Comment      = single pulse decoupled
Data Format   = 1D COMPLEX
Dim Size     = 26214
Dim Title    = Carbon13
Dim Units    = [ppm]
Dimensions   = X
Site         = JNM-ECAS500II
Spectrometer = DELTA2_NMR

Field Strength = 11.7473579[T] (500 MHz)
X_Acq_Duration = 0.83361792[s]
X_Domain      = 13C
X_Freq        = 125.76529768[MHz]
X_Offset      = 100[ppm]
X_Points     = 32768
X_Fscans     = 4
X_Resolution  = 1.19959034[Hz]
X_Sweep      = 39.3081761[kHz]
X_Sweep_Clip = 31.44654088[kHz]
Irr_Domain    = Proton
Irr_Freq      = 500.15991521[MHz]
Irr_Offset    = 5.0[ppm]
Clipped       = TRUE
Scans         = 3700
Total Scans   = 3700

Relaxation_Delay = 2[s]
Recov_Gain       = 58
Temp_Get        = 20.2[dC]
X_90_Width     = 52.78[us]
X_Acq_Time      = 0.83361792[s]
X_Angle         = 30[deg]
X_Attn         = 9.7[dB]
X_Pulse        = 17.59333333[us]
Irr_Atn_Dec    = 20.948[dB]
Irr_Atn_Noe    = 20.948[dB]
Irr_Mode       = WALTZ
Irr_Pwidth     = 92[us]
Decoupling     = TRUE
Initial_Wait    = 1[s]
Noe            = TRUE
Noe Time       = 2[s]
Repetition_Time = 2.83361792[s]
  
```

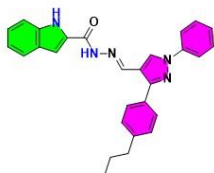

(8b)

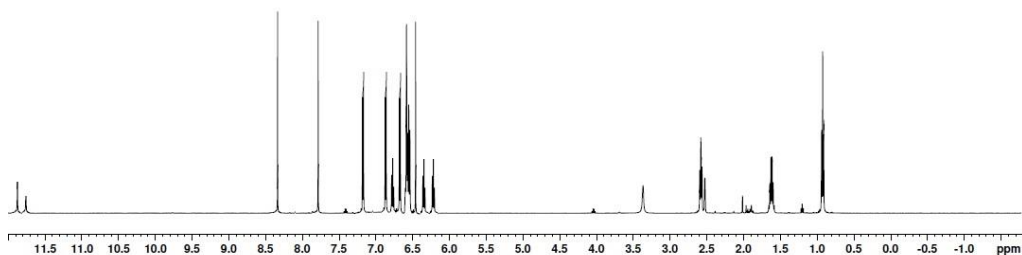

Mansoura University  
JEOL  
ECA-500 II  
NMR Unit

```

Filename = Manar Nagy_5_proton-1-6
Author = delta
Experiment = proton.jpg
Sample Id = Manar Nagy_5
Solvent = DMSO-D6
Creation Time = 18-JUL-2019 17:19:21
Revision Time = 18-JUL-2019 17:10:03
Current Time = 18-JUL-2019 17:11:10

Comment = single pulse
Data Format = 1D COMPLEX
Dim Size = 13107
Dim Title = Proton
Dim Units = [ppm]
Dimensions = X
Site = JNM-BCA500II
Spectrometer = DBLTA2_NMR

Field Strength = 11.7473579[T] (500 [MHz])
X_Acq_Duration = 1.4548992[s]
X_Domain = 1H
X_Freq = 500.15991521 [MHz]
X_Offset = 6 [ppm]
X_Points = 14364
X_Prescans = 1
X_Resolution = 0.68733264 [Hz]
X_Sweep = 11.26126126 [kHz]
X_Sweep_Clipped = 9.00900901 [kHz]
Irx_Domain = Proton
Irx_Freq = 500.15991521 [MHz]
Irx_Offset = 5.0 [ppm]
Irx_Prescans = 1
Irx_Resolution = 0.68733264 [Hz]
Irx_Sweep = 11.26126126 [kHz]
Irx_Sweep_Clipped = 9.00900901 [kHz]
Clipped = FALSE
Scans = 40
Total Scans = 40

Relaxation_Delay = 5 [s]
Recvx_Gain = 36
Temp_Get = 21.1 [dC]
X_90_Width = 14.1 [us]
X_Acq_Time = 1.4548992 [s]
X_Angle = 45 [deg]
X_Atn = 4.9 [dB]
X_Pulse = 7.25 [us]
Irx_Mode = Off
Irx_Noise = FALSE
Initial_Wait = 1 [s]
Repetition_Time = 6.4548992 [s]

```

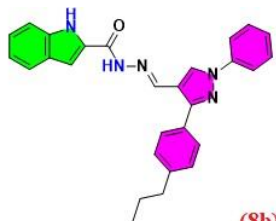

(8b)

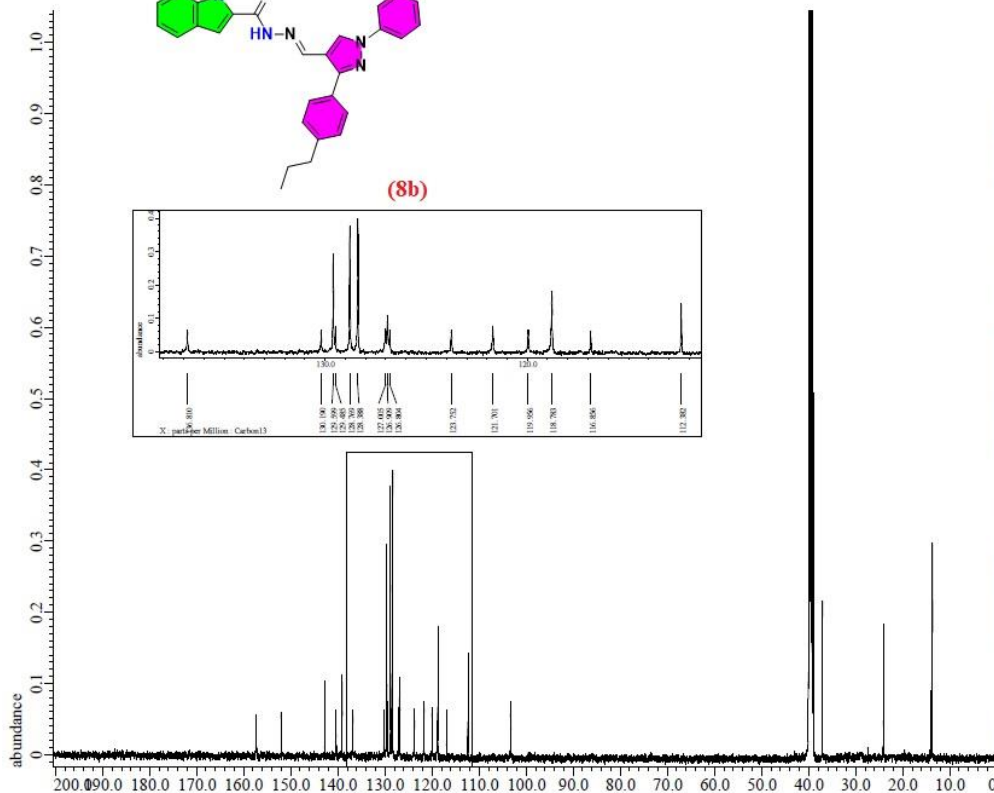

Mansoura University  
JEOL  
ECA-500 II  
NMR Unit

```

Filename = Manar Nagy_5_carbon-1-6
Author = delta
Experiment = carbon.jpg
Sample Id = Manar Nagy_5
Solvent = DMSO-D6
Creation Time = 21-JUL-2019 17:43:45
Revision Time = 21-JUL-2019 18:00:17
Current Time = 21-JUL-2019 18:00:22

Comment = single pulse decoupled
Data Format = 1D COMPLEX
Dim Size = 26214
Dim Title = Carbon13
Dim Units = [ppm]
Dimensions = X
Site = JNM-BCA500II
Spectrometer = DBLTA2_NMR

Field Strength = 11.7473579[T] (500 [MHz])
X_Acq_Duration = 0.83361792 [s]
X_Domain = 13C
X_Freq = 125.76529768 [MHz]
X_Offset = 100 [ppm]
X_Points = 32768
X_Prescans = 4
X_Resolution = 1.19959034 [Hz]
X_Sweep = 39.3081761 [kHz]
X_Sweep_Clipped = 31.44654068 [kHz]
Irx_Domain = Proton
Irx_Freq = 500.15991521 [MHz]
Irx_Offset = 5.0 [ppm]
Irx_Prescans = 1
Irx_Resolution = 1.19959034 [Hz]
Irx_Sweep = 39.3081761 [kHz]
Irx_Sweep_Clipped = 31.44654068 [kHz]
Clipped = FALSE
Scans = 1099
Total Scans = 1099

Relaxation_Delay = 2 [s]
Recvx_Gain = 58
Temp_Get = 18.7 [dC]
X_90_Width = 52.78 [us]
X_Acq_Time = 0.83361792 [s]
X_Angle = 30 [deg]
X_Atn = 9.7 [dB]
X_Pulse = 17.59333333 [us]
Irx_Atn_Dec = 20.948 [dB]
Irx_Atn_Noise = 20.948 [dB]
Irx_Noise = WALTZ
Irx_Pwidth = 92 [us]
Decoupling = TRUB
Initial_Wait = 1 [s]
Noe = TRUB
Noe Time = 2 [s]
Repetition_Time = 2.83361792 [s]

```



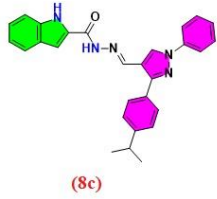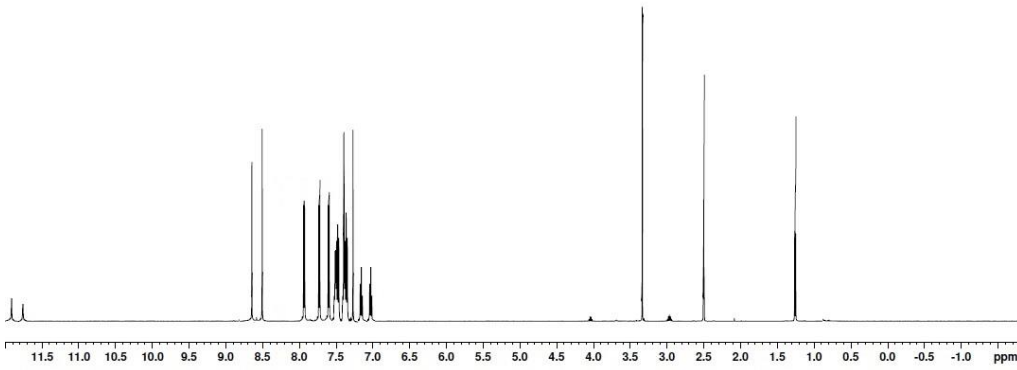

Mansoura University  
JEOL  
ECA-500 II

Filename = Manar Nasy\_6\_proton-1-6  
 Author = delta  
 Experiment = proton\_jsp  
 Sample Id = Manar Nasy\_6  
 Solvent = DMSO-D6  
 Creation Time = 26-JUL-2019 13:19:21  
 Revision Time = 26-JUL-2019 13:10:03  
 Current Time = 26-JUL-2019 13:11:10

Comment = single pulse  
 Data Format = 1D CDEMUX  
 Dim Size = 13107  
 Dim Title = Proton  
 Dim Units = [ppm]  
 Dimensions = X  
 Site = JNM-BCA500II  
 Spectrometer = DELTA2\_NMR

Field Strength = 11.7473579 [T] (500 [MHz])  
 X\_Acq\_Duration = 1.4548992 [s]  
 X\_Domain = 1H  
 X\_Freq = 500.15991521 [MHz]  
 X\_Offset = 6 [ppm]  
 X\_Points = 14384  
 X\_Prescans = 1  
 X\_Resolution = 0.68733264 [Hz]  
 X\_Sweep = 11.26126126 [kHz]  
 X\_Sweep\_Clipped = 9.00909091 [kHz]  
 Irr\_Domain = Proton  
 Irr\_Freq = 500.15991521 [MHz]  
 Irr\_Offset = 5.0 [ppm]  
 Irr\_Domain = Proton  
 Irr\_Freq = 500.15991521 [MHz]  
 Irr\_Offset = 5.0 [ppm]  
 Clipped = FALSE  
 Scans = 40  
 Total Scans = 40

Relaxation\_Delay = 5 [s]  
 Recvz\_Gain = 36  
 Temp\_Set = 21.1 [dC]  
 X\_90\_Width = 14.3 [us]  
 X\_Acq\_Time = 1.4548992 [s]  
 X\_Angle = 45 [deg]  
 X\_Atn = 4.9 [dB]  
 X\_Pulse = 7.25 [us]  
 Irr\_Mode = Off  
 Irr\_Mode = Off  
 Irr\_Noise = FALSE  
 Initial\_Wait = 1 [s]  
 Repetition\_Time = 6.4548992 [s]

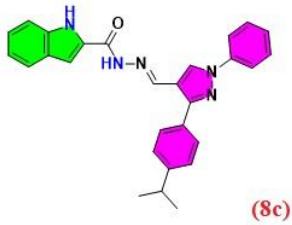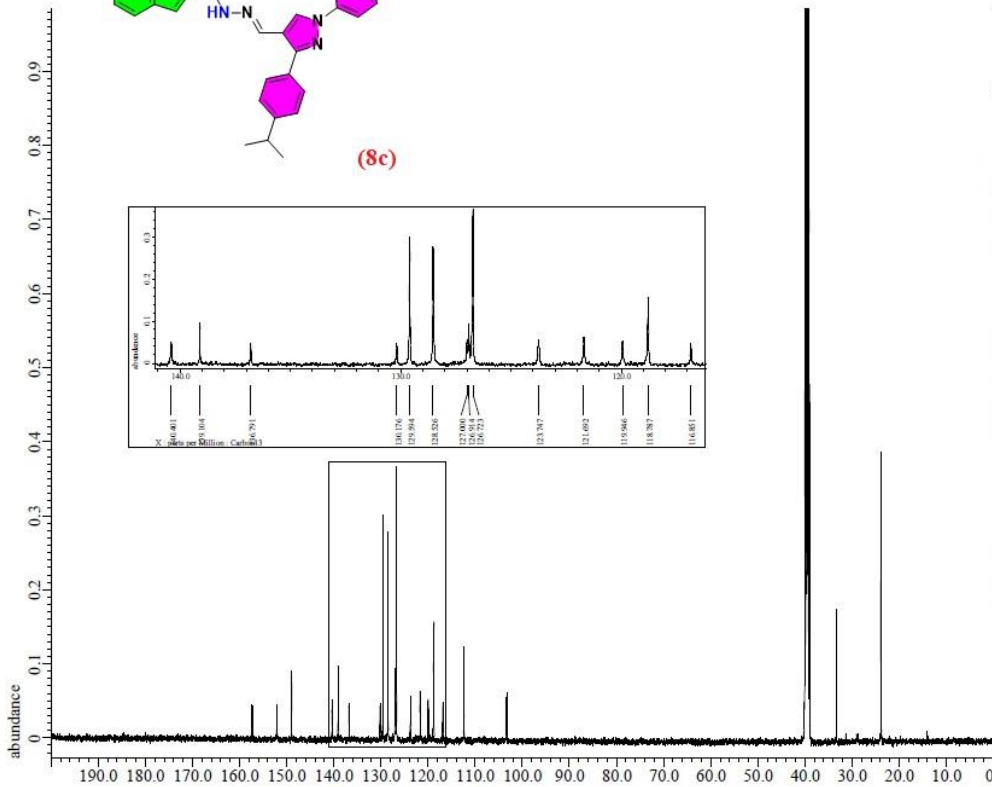

Mansoura University  
JEOL  
ECA-500 II

Filename = Manar Nasy\_4\_carbon-1-7.  
 Author = delta  
 Experiment = carbon\_jsp  
 Sample Id = Manar Nasy\_4  
 Solvent = DMSO-D6  
 Creation Time = 18-AUG-2019 14:24:01  
 Revision Time = 18-AUG-2019 15:10:24  
 Current Time = 18-AUG-2019 15:10:55

Comment = single pulse decoupled g  
 Data Format = 1D COMPLEX  
 Dim Size = 52429  
 Dim Title = Carbon13  
 Dim Units = [ppm]  
 Dimensions = X  
 Site = JNM-BCA500II  
 Spectrometer = DELTA2\_NMR

Field Strength = 11.7473579 [T] (500 [MHz])  
 X\_Acq\_Duration = 0.83361792 [s]  
 X\_Domain = 13C  
 X\_Freq = 125.76529768 [MHz]  
 X\_Offset = 100 [ppm]  
 X\_Points = 32768  
 X\_Prescans = 4  
 X\_Resolution = 1.19959034 [Hz]  
 X\_Sweep = 39.3081761 [kHz]  
 X\_Sweep\_Clipped = 31.44654088 [kHz]  
 Irr\_Domain = Proton  
 Irr\_Freq = 500.15991521 [MHz]  
 Irr\_Offset = 5.0 [ppm]  
 Clipped = TRUE  
 Scans = 1750  
 Total Scans = 1750

Relaxation\_Delay = 2 [s]  
 Recvz\_Gain = 58  
 Temp\_Set = 21.5 [dC]  
 X\_90\_Width = 52.78 [us]  
 X\_Acq\_Time = 0.83361792 [s]  
 X\_Angle = 30 [deg]  
 X\_Atn = 9.7 [dB]  
 X\_Pulse = 17.59333333 [us]  
 Irr\_Atn\_Dec = 20.948 [dB]  
 Irr\_Atn\_Noise = 20.948 [dB]  
 Irr\_Noise = FALSE  
 Irr\_Pwidth = 92 [us]  
 Decoupling = TRUE  
 Initial\_Wait = 1 [s]  
 Noe = TRUE  
 Noe\_Time = 2 [s]  
 Repetition\_Time = 2.83361792 [s]

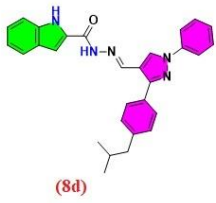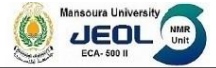

```

Filename = Manax Nagy_9_proton-1-9
Author = delta
Experiment = proton_jmp
Sample Id = Manax Nagy_9
Solvent = DMSO-d6
Creation Time = 29-JUL-2019 11:07:21
Revision Time = 29-JUL-2019 11:10:03
Current Time = 29-JUL-2019 11:11:10

Comment = single pulse
Data Format = 1D COMPLEX
Dim Size = 13107
Dim Title = Proton
Dim Units = [ppm]
Dimensions = X
Site = JNM-PCA500II
Spectrometer = DBLFA2_NMR

Field Strength = 11.7473579[T] (500 MHz)
X_Acq_Duration = 1.4548992[s]
X_Domain = 1H
X_Freq = 500.15991521[MHz]
X_Offset = 6[ppm]
X_Points = 14384
X_Prescans = 1
X_Resolution = 0.68733284[Hz]
X_Sweep = 11.26126126[kHz]
X_Sweep_Clipped = 9.00900901[kHz]
Irx_Domain = Proton
Irx_Freq = 500.15991521[MHz]
Irx_Offset = 5.0[ppm]
Tri_Domain = Proton
Tri_Freq = 500.15991521[MHz]
Tri_Offset = 5.0[ppm]
Clipped = FALSE
Scans = 40
Total Scans = 40

Relaxation_Delay = 5[s]
Recovr_Gain = 36
Temp_Set = 21.1[deg]
X_90_Width = 14.3[us]
X_Acq_Time = 1.4548992[s]
X_Angle = 45[deg]
X_Atn = 4.9[dB]
X_Pulse = 7.25[us]
Irx_Mode = Off
Tri_Mode = Off
Densit_Preset = FIDM
Initial_Wait = 1[s]
Repetition_Time = 6.4548992[s]

```

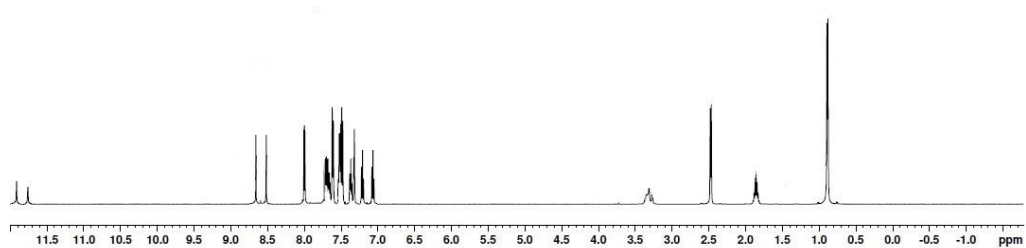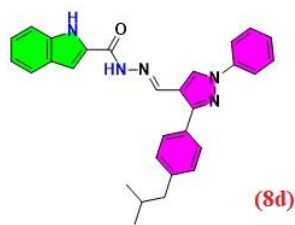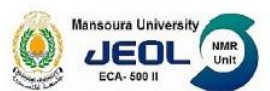

```

Filename = Manax Nagy_6_carbon-1-7.
Author = delta
Experiment = carbon_jmp
Sample Id = Manax Nagy_6
Solvent = DMSO-d6
Creation Time = 19-AUG-2019 15:56:13
Revision Time = 19-AUG-2019 09:16:56
Current Time = 19-AUG-2019 09:17:01

Comment = single pulse decoupled g
Data Format = 1D COMPLEX
Dim Size = 26214
Dim Title = Carbon13
Dim Units = [ppm]
Dimensions = X
Site = JNM-PCA500II
Spectrometer = DBLFA2_NMR

Field Strength = 11.7473579[T] (500 MHz)
X_Acq_Duration = 0.83361792[s]
X_Domain = 13C
X_Freq = 125.76529768[MHz]
X_Offset = 100[ppm]
X_Points = 32768
X_Prescans = 4
X_Resolution = 1.19959034[Hz]
X_Sweep = 39.3081761[kHz]
X_Sweep_Clipped = 31.44654088[kHz]
Irx_Domain = Proton
Irx_Freq = 500.15991521[MHz]
Irx_Offset = 5.0[ppm]
Clipped = TRUE
Scans = 2500
Total Scans = 2500

Relaxation_Delay = 2[s]
Recovr_Gain = 58
Temp_Set = 20[deg]
X_90_Width = 52.78[us]
X_Acq_Time = 0.83361792[s]
X_Angle = 30[deg]
X_Atn = 9.7[dB]
X_Pulse = 17.59333333[us]
Irx_Atn_Dec = 20.948[dB]
Irx_Atn_NoE = 20.948[dB]
Irx_Noise = WALTZ
Irx_Width = 92[us]
Decoupling = TRUB
Initial_Wait = 1[s]
Noe = TRUB
Noe_Time = 21[s]
Repetition_Time = 2.83361792[s]

```

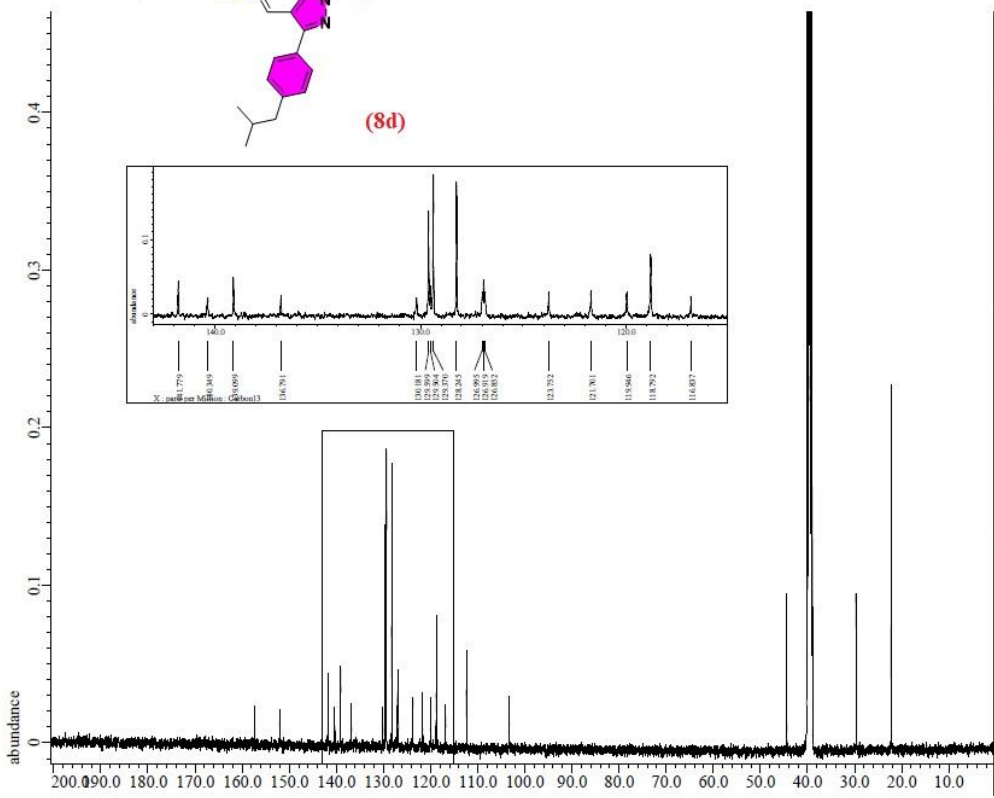

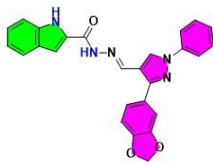

(8e)

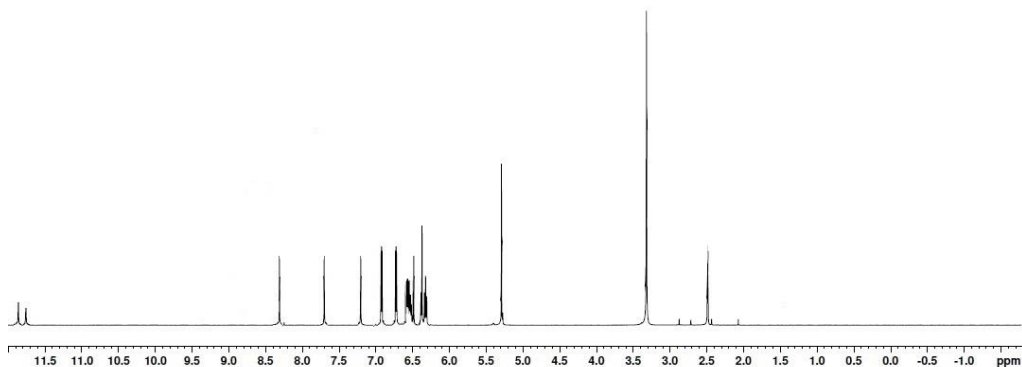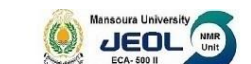

```

Filename      = Manar Nagy10_proton-1-10
Author       = delta
Experiment   = proton.jpg
Sample Id    = Manar Nagy_10
Solvent      = DMSO-D6
Creation Time = 30-JUL-2019 11:47:21
Revision Time = 30-JUL-2019 14:10:03
Current Time  = 30-JUL-2019 14:11:10

Comment      = single pulse
Data Format   = 1D C1H5X
Dim Size     = 13107
Dim Title    = Proton
Dim Units    = [ppm]
Dimensions   = X
Site         = JNM-ECAS500II
Spectrometer = DELTA2_NMR

Field Strength = 11.7473579[T] (500[MHz])
X_Acq Duration = 1.4548992[s]
X_Domain      = 1H
X_Freq        = 500.15991521[MHz]
X_Offset      = 6[ppm]
X_Points      = 14384
X_Prescans    = 1
X_Resolution  = 0.68733264[Hz]
X_Sweep       = 11.26126126[kHz]
X_Sweep Clipped = 9.00900901[kHz]
Irr_Domain    = Proton
Irr_Freq      = 500.15991521[MHz]
Irr_Offset    = 5.0[ppm]
Irr_Domain    = Proton
Tri_Freq      = 500.15991521[MHz]
Tri_Offset    = 5.0[ppm]
Clipped       = FALSE
Scans         = 40
Total Scans   = 40

Relaxation Delay = 5[s]
Recvr Gain      = 36
Temp_Get       = 21.1[dc]
X_90_Width     = 14.3[us]
X_Acq Time     = 1.4548992[s]
X_Angle        = 45[deg]
X_Atn         = 4.9[db]
X_Pulse        = 7.25[us]
Irr_Atn        = Off
Tri_Mode       = Off
Density Preset = FALSE
Initial Wait   = 1[s]
Repetition Time = 6.4548992[s]
  
```

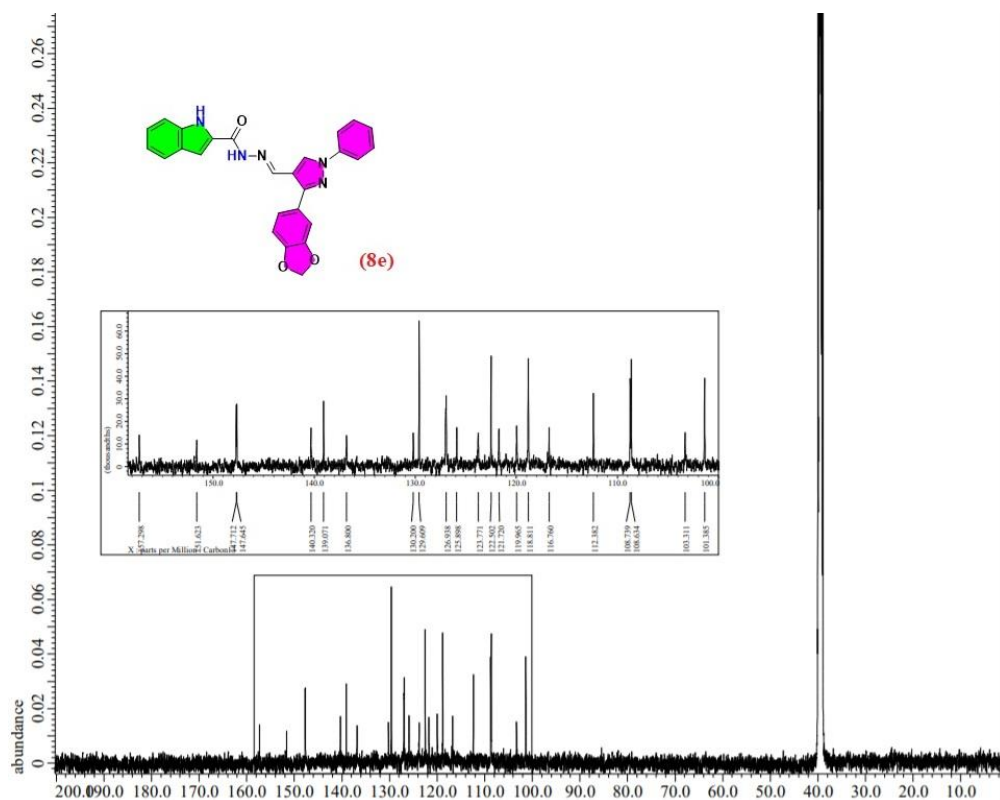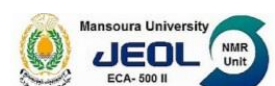

```

Filename      = Manar Nagy_8_carbon-1-1
Author       = delta
Experiment   = carbon.jpg
Sample Id    = Manar Nagy_8
Solvent      = DMSO-D6
Creation Time = 18-AUG-2019 20:20:43
Revision Time = 19-AUG-2019 09:09:26
Current Time  = 19-AUG-2019 09:10:27

Comment      = single pulse decoupled
Data Format   = 1D REAL
Dim Size     = 26214
Dim Title    = Carbon13
Dim Units    = [ppm]
Dimensions   = X
Site         = JNM-ECAS500II
Spectrometer = DELTA2_NMR

Field Strength = 11.7473579[T] (500[MHz])
X_Acq Duration = 0.83361792[s]
X_Domain      = 13C
X_Freq        = 125.76529768[MHz]
X_Offset      = 100[ppm]
X_Points      = 32768
X_Prescans    = 4
X_Resolution  = 1.19959034[Hz]
X_Sweep       = 39.3081761[kHz]
X_Sweep Clipped = 31.44654088[kHz]
Irr_Domain    = Proton
Irr_Freq      = 500.15991521[MHz]
Irr_Offset    = 5.0[ppm]
Clipped       = TRUE
Scans         = 2500
Total Scans   = 2500

Relaxation Delay = 2[s]
Recvr Gain      = 58
Temp_Get       = 18.3[dc]
X_90_Width     = 52.78[us]
X_Acq Time     = 0.83361792[s]
X_Angle        = 30[deg]
X_Atn         = 9.7[db]
X_Pulse        = 17.59333333[us]
Irr_Atn        = 20.948[db]
Irr_Atn_Noise = 20.948[db]
Irr_Noise     = WALTZ
Irr_Pwidth     = 92[us]
Decoupling     = TRUE
Initial Wait   = 1[s]
Noe            = TRUE
Noe Time       = 2[s]
Repetition Time = 2.83361792[s]
  
```

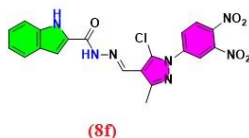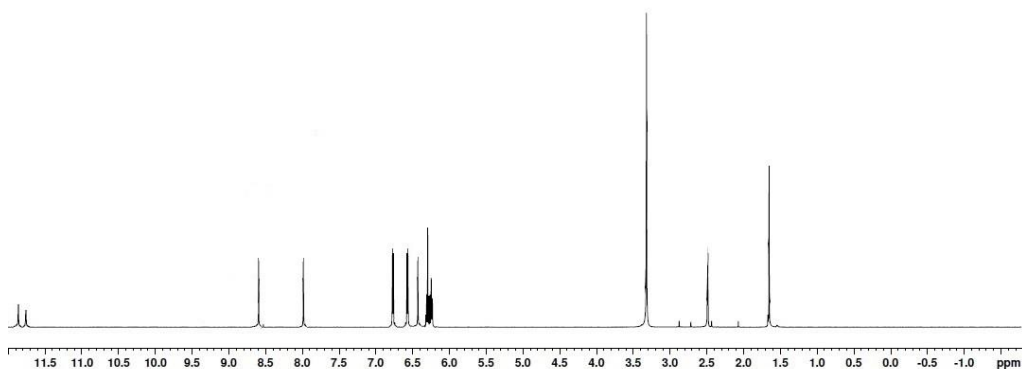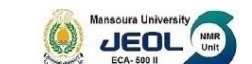

```

Filename      = Manar Nagy10_proton-1-11
Author       = delta
Experiment   = proton JMP
Sample Id    = Manar Nagy_11
Solvent      = DMSO-D6
Creation Time = 30-JUL-2019 15:03:21
Revision Time = 30-JUL-2019 15:10:47
Current Time  = 30-JUL-2019 15:11:10

Comment      = single pulse
Data Format   = 1D CDEXX
Dim Size     = 13107
Dim Title    = Proton
Dim Units    = [ppm]
Dimensions   = X
Site         = JNM-MCA500II
Spectrometer = DELTA2_NMR

Field Strength = 11.7473579[T] (500 [MHz])
X_Acq_Duration = 1.4548992[s]
X_Domain      = 1H
X_Freq        = 500.15991521 [MHz]
X_Offset      = 6 [ppm]
X_Points      = 14384
X_Prescans    = 1
X_Resolution  = 0.68733264 [Hz]
X_Sweep       = 11.26126126 [kHz]
X_Sweep_Clipped = 9.00900901 [kHz]
Irr_Domain    = Proton
Irr_Freq      = 500.15991521 [MHz]
Irr_Offset    = 5.0 [ppm]
Irr_Domain    = Proton
Tri_Domain    = Proton
Tri_Freq      = 500.15991521 [MHz]
Tri_Offset    = 5.0 [ppm]
Clipped       = FALSB
Scans         = 40
Total Scans   = 40

Relaxation_Delay = 5 [s]
Recvx_Gain       = 36
Temp_Set         = 21.1 [dC]
X_90_Width      = 14.3 [us]
X_Acq_Time      = 1.4548992 [s]
X_Angle         = 45 [deg]
X_Atn           = 4.9 [dB]
X_Pulse         = 7.25 [us]
Irr_Mode        = Off
Dens1_Preset    = FALSB
Initial_Wait    = 1 [s]
Repetition_Time = 6.4548992 [s]
  
```

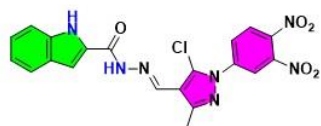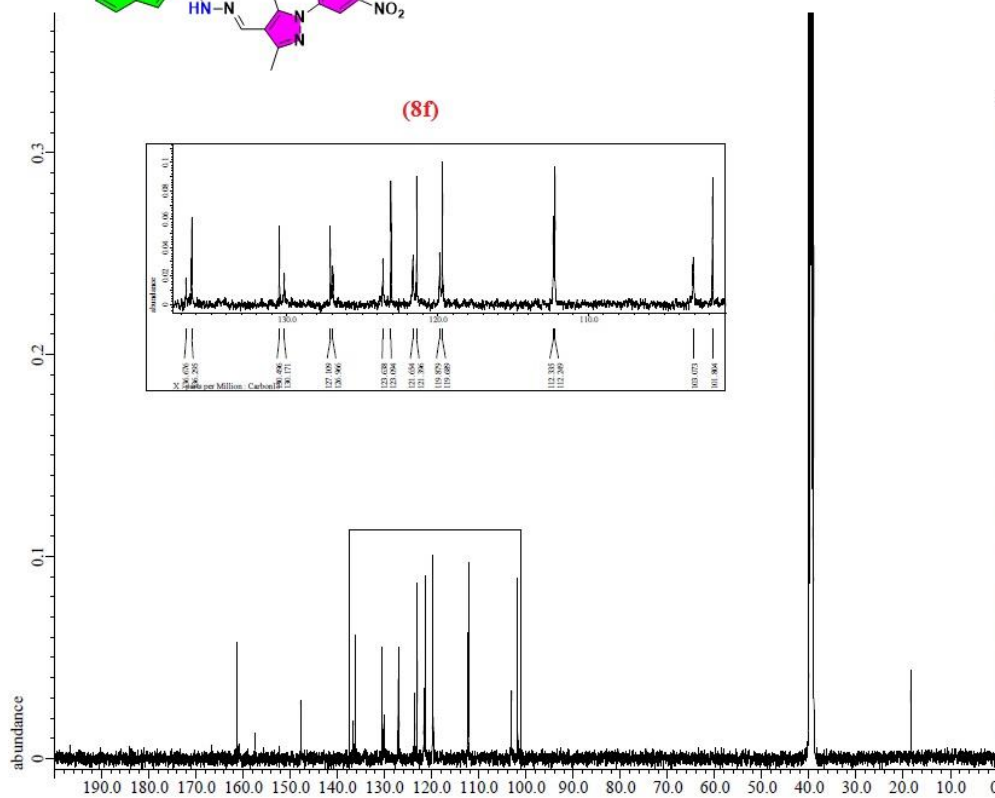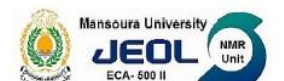

```

Filename      = Manar Nagy_11_carbon-1-1
Author       = delta
Experiment   = carbon JMP
Sample Id    = Manar Nagy_11
Solvent      = DMSO-D6
Creation Time = 10-SEP-2019 13:58:07
Revision Time = 15-SEP-2019 15:04:31
Current Time  = 15-SEP-2019 15:05:11

Comment      = single pulse decoupled g
Data Format   = 1D REAL
Dim Size     = 26214
Dim Title    = Carbon13
Dim Units    = [ppm]
Dimensions   = X
Site         = JNM-MCA500II
Spectrometer = DELTA2_NMR

Field Strength = 11.7473579[T] (500 [MHz])
X_Acq_Duration = 0.83361792 [s]
X_Domain      = 13C
X_Freq        = 125.76529768 [MHz]
X_Offset      = 100 [ppm]
X_Points      = 32768
X_Prescans    = 4
X_Resolution  = 1.19959034 [Hz]
X_Sweep       = 39.3081761 [kHz]
X_Sweep_Clipped = 31.44654088 [kHz]
Irr_Domain    = Proton
Irr_Freq      = 500.15991521 [MHz]
Irr_Offset    = 5.0 [ppm]
Clipped       = TRU8
Scans         = 2402
Total Scans   = 2402

Relaxation_Delay = 2 [s]
Recvx_Gain       = 58
Temp_Set         = 19.9 [dC]
X_90_Width      = 52.78 [us]
X_Acq_Time      = 0.83361792 [s]
X_Angle         = 30 [deg]
X_Atn           = 9.7 [dB]
X_Pulse         = 17.59333333 [us]
Irr_Atn_Dec     = 20.948 [dB]
Irr_Atn_Noise  = 20.948 [dB]
Irr_Noise       = WJLJ5
Irr_Pwidth      = 92 [us]
Decoupling      = TRU8
Initial_Wait    = 1 [s]
Noe              = TRU8
Noe_Time        = 2 [s]
Repetition_Time = 2.83361792 [s]
  
```
